# Supplementary material
Source: PubMed Central journal article supplement (PMC2840191)
Supplement: NIHMS182258-supplement-1_si_001.pdf [file NIHMS182258-supplement-1_si_001.pdf]

Supporting information

SI Figure 1

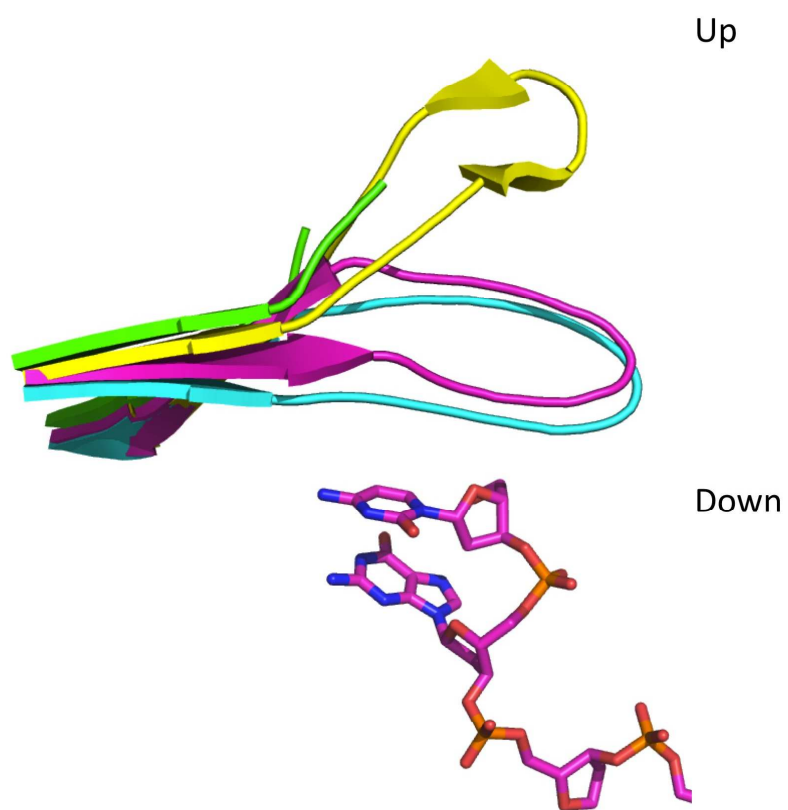

**SI figure 1:** Superposition of the  $\beta$  hairpin loop from four different RB69 gp43 DNA complexes. The Gh complex is shown in green, the dA•dTTP closed ternary complex (PDB ID code 1IG9 (*17*)) in yellow, the THF•dAMP binary complex (PDB ID code 2P5O, molecule C (*12*)) in pink, and the Tg•dAMP binary complex (PDB ID code 2DY4, molecule C (*14*)) in cyan. The  $\beta$  hairpin was observed in crystals in two conformations, “up” and “down”. In the “down” conformation the  $\beta$  hairpin contacts the single stranded 5'-end of the DNA template.
